# Supplementary material
Source: HighWire-hosted journal article supplement (https://jitc.bmj.com/content/11/3/e006432)
Supplement: inline-supplementary-material-6 [file inline-supplementary-material-6.pdf]

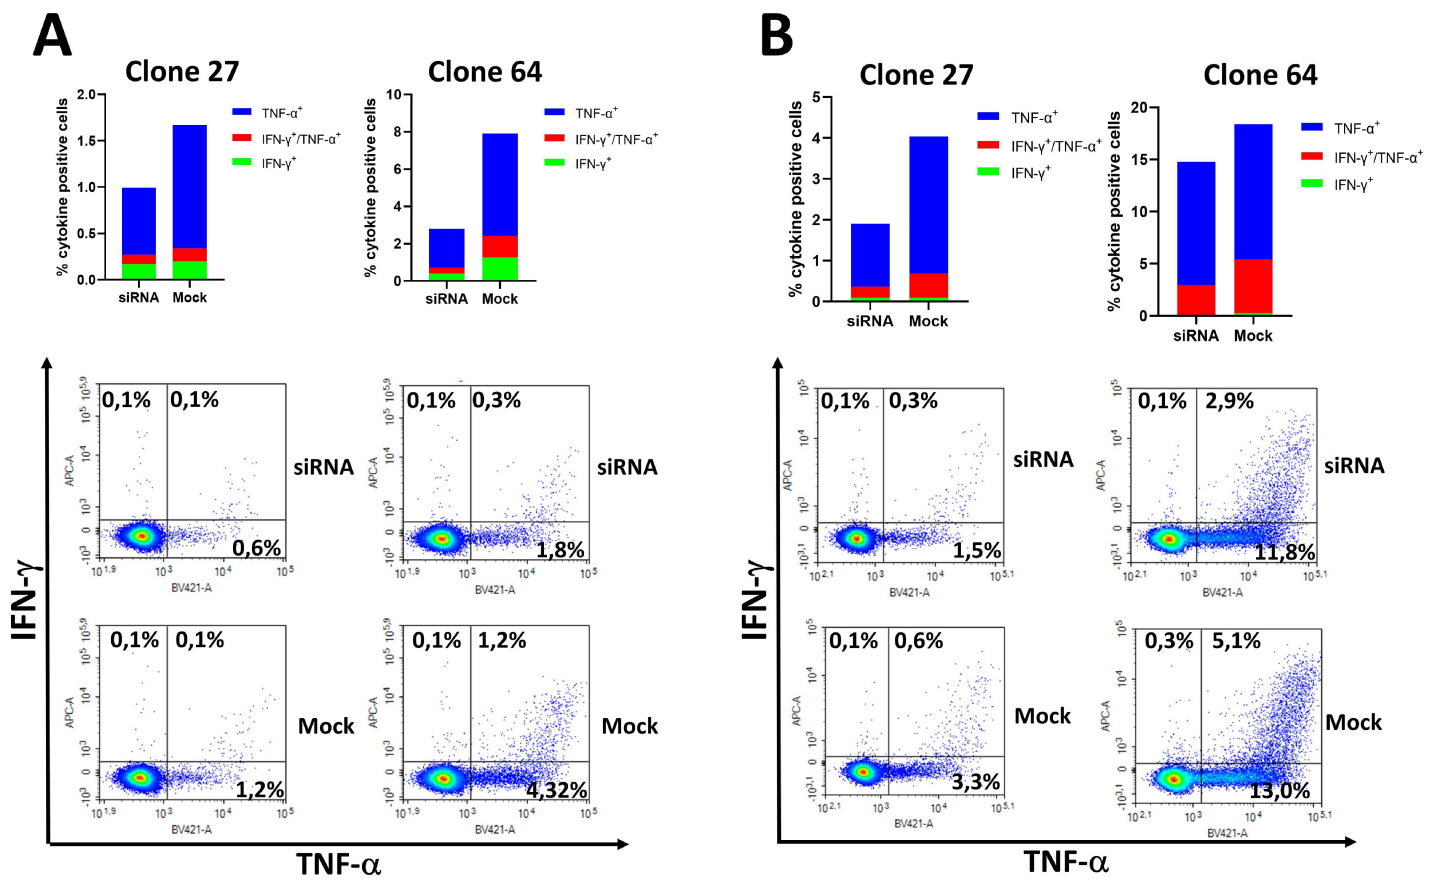

**Supplementary Figure 4. Regulatory myeloid cells are recognized by TGF $\beta$ -15 specific T-cell clones at different effector:target cell ratios. A.** Autologous regulatory myeloid cells that were either mock transfected or transfected with TGF $\beta$  siRNA were assayed in an intracellular cytokine staining with an effector:target ratio of 20:1. Upon subsequent analysis by flow cytometry, the amount of cytokine producing cells were assessed and depicted graphically (top) with density plots from experiment shown (below). **B.** Experiment shown with same effector and target cells was reperformed but with an effector:target ratio of 4:1.
